# Supplementary material
Source: PubMed Central journal article supplement (PMC6786259)
Supplement: NIHMS1052590-supplement-1.pdf [file NIHMS1052590-supplement-1.pdf]

**Table S1. Pilot survey data at 17 months after initiation of mentoring\***

|                                      | <i>mentees</i>    | <i>mentors</i>     | <i>overall</i>    |
|--------------------------------------|-------------------|--------------------|-------------------|
| <b>Responses (%)</b>                 | <b>18/19 (95)</b> | <b>19/19 (100)</b> | <b>37/38 (97)</b> |
| At least one substantial interaction | 17 (89)           | 19 (100)           | 36 (97)           |
| ≥2 interactions                      | 16 (89)           | 19 (100)           | 35 (95)           |
| <b>Match quality**</b>               |                   |                    |                   |
| Poor                                 | 0                 | 0                  | 0                 |
| Modest                               | 2 (11)            | 4 (21)             | 6 (16)            |
| Good                                 | 6 (33)            | 6 (32)             | 12 (32)           |
| Excellent                            | 10 (56)           | 9 (47)             | 19 (51)           |
| <b>Helpful to the mentee</b>         |                   |                    |                   |
| No                                   | 0                 | 1 (5)              | 1 (3)             |
| Yes                                  | 15 (83)           | 12 (63)            | 27 (73)           |
| Not sure yet                         | 3 (18)            | 6 (32)             | 9 (24)            |
| <b>Benefits</b>                      |                   |                    |                   |
| Career path/job search               | 18 (100)          | 13 (68)            | 31 (84)           |
| Research/scholarship                 | 12 (67)           | 10 (53)            | 22 (59)           |
| Job satisfaction                     | 13 (72)           | 12/17 (71)         | 25/35 (71)        |
| Work-life balance                    | 8 (44)            | 12/18 (67)         | 20/36 (56)        |
| <b>Benefit to mentors</b>            |                   |                    |                   |
| Mentoring skills                     | -                 | 12/18 (67)         |                   |
| Professional portfolio               | -                 | 8/17 (47)          |                   |
| Enhanced connection to community     | 14/17 (82)        | 14 (75)            | 28/36 (78)        |
| <b>Should AMIGO be continued?</b>    | <b>18 (100)</b>   | <b>19 (100)</b>    | <b>37 (100)</b>   |

\*19 dyads still active (one mentee left the country). \*\*Overlap of mentee needs and mentor experience, thereby enabling guidance to the mentee.
